# Supplementary material
Source: PubMed Central journal article supplement (PMC4495962)
Supplement: NIHMS605468-supplement-Figure_S1.pdf [file NIHMS605468-supplement-Figure_S1.pdf]

Figure S1. Proportion of internal details within each detail type was similar across groups and memory conditions, as indicated by a null main effect of group ( $F_{2,25} = .16, p = .85, \eta^2 = .01$ ) and condition ( $F_{1,47,36.62} = .50, p = .55, \eta^2 = .02$ ) with no significant higher order interactions between group and detail type or group and condition (all  $p$ s > .15). HCs, healthy controls; PTSD, post-traumatic stress disorder.

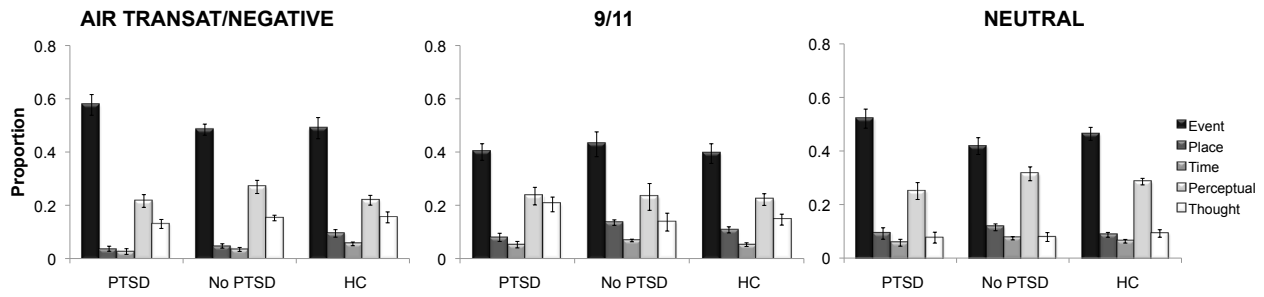

Figure S1.
