# Supplementary material
Source: PubMed Central journal article supplement (PMC4495962)
Supplement: NIHMS605468-supplement-TableS1.pdf [file NIHMS605468-supplement-TableS1.pdf]

Supplementary Table 1.

|                         | <u>AT Passengers</u> |                | <u>HCs</u>  |
|-------------------------|----------------------|----------------|-------------|
|                         | <i>PTSD</i>          | <i>No PTSD</i> |             |
| <i>Important then</i>   |                      |                |             |
| AT/Negative             | 8.57 (3.78)          | 9.80 (0.45)    | 9.47 (0.83) |
| 9/11                    | 8.14 (3.76)          | 8.20 (1.64)    | 7.67 (3.20) |
| Neutral                 | 8.50 (2.07)          | 7.20 (1.79)    | 6.07 (2.87) |
| <i>Important now</i>    |                      |                |             |
| AT/Negative             | 8.29 (3.73)          | 7.00 (2.83)    | 5.93 (3.10) |
| 9/11                    | 7.29 (3.45)          | 5.80 (3.03)    | 6.80 (3.26) |
| Neutral                 | 5.33 (3.83)          | 3.60 (3.65)    | 4.07 (3.03) |
| <i>Come to mind</i>     |                      |                |             |
| AT/Negative             | 8.29 (2.17)          | 7.40 (2.10)    | 7.98 (1.80) |
| 9/11                    | 6.76 (3.01)          | 5.07 (1.86)    | 7.51 (1.63) |
| Neutral                 | 5.38 (2.89)          | 5.36 (1.87)    | 6.84 (2.33) |
| <i>Thoughts</i>         |                      |                |             |
| AT/Negative             | 7.71 (2.28)          | 7.20 (1.92)    | 7.78 (1.44) |
| 9/11                    | 6.69 (2.55)          | 4.93 (1.52)    | 6.89 (1.94) |
| Neutral                 | 5.00 (2.67)          | 4.43 (2.32)    | 6.49 (2.58) |
| <i>Visualize</i>        |                      |                |             |
| AT/Negative             | 7.29 (2.27)          | 7.07 (1.75)    | 7.09 (2.03) |
| 9/11                    | 5.76 (2.79)          | 4.40 (1.55)    | 6.58 (2.04) |
| Neutral                 | 4.67 (2.35)          | 4.60 (1.69)    | 5.89 (2.57) |
| <i>Emotional change</i> |                      |                |             |
| AT/Negative             | 8.24 (1.17)          | 7.60 (2.02)    | 6.80 (1.97) |
| 9/11                    | 6.43 (1.57)          | 5.13 (0.99)    | 5.13 (2.86) |
| Neutral                 | 3.48 (2.61)          | 3.53 (2.38)    | 3.93 (2.54) |
| <i>Often think</i>      |                      |                |             |
| AT/Negative             | 6.29 (2.75)          | 4.67 (3.08)    | 2.87 (2.35) |
| 9/11                    | 3.33 (2.26)          | 1.60 (0.60)    | 2.47 (2.25) |
| Neutral                 | 1.43 (0.53)          | 1.20 (0.45)    | 1.58 (1.04) |

Note: Values are mean (standard deviations).

**Abbreviations:** AT, Air Transat; PTSD, post-traumatic stress disorder; HCs, Healthy controls.
